1

# 2 Forecasting the impact of population 3 ageing on tuberculosis incidence

4

## 5 **Authors**

6 Chu-Chang Ku<sup>1\*</sup> and Peter J Dodd<sup>1</sup>

7

8

9 1. School of Health and Related Research, University of Sheffield, Sheffield, United  
10 Kingdom

11

12

13

## 14 **Corresponding author:**

15 \* Email: [cku1@sheffield.ac.uk](mailto:cku1@sheffield.ac.uk)(CCK)

16

17 These authors contributed equally to this work.

## 18 Abstract

19 **Background:** Tuberculosis (TB) disease reactivates from distant latent infection or recent  
20 (re)infection. Progression risks increase with age. Across the World Health Organisation  
21 Western Pacific region, many populations are ageing and have the highest per capita TB  
22 incidence rates in older age groups. However, methods for analysing age-specific TB  
23 incidence and forecasting epidemic trends while accounting for demographic change remain  
24 limited.

25

26 **Methods:** We applied the Lee-Carter models, which were originally developed for mortality  
27 modelling, to model the temporal trends in age-specific TB incidence data from 2005 to 2018  
28 in Taiwan. Females and males were modelled separately. We combined our demographic  
29 forecasts, and age-specific TB incidence forecasts to project TB incidence until 2035. We  
30 compared TB incidence projections with demography fixed in 2018 to projections accounting  
31 for demographic change.

32

33 **Results:** Our models quantified increasing incidence rates with age and declining temporal  
34 trends. By 2035, the forecast suggests that the TB incidence rate in Taiwan will decrease by  
35 54% (95% Prediction Interval (PI): 45%-59%) compared to 2015, while most age-specific  
36 incidence rates will reduce by more than 60%. In 2035, adults aged 65 and above will make  
37 up 78% of incident TB cases. Forecast TB incidence in 2035 accounting for demographic  
38 change will be 39% (95% PI: 36%-42%) higher than without population ageing.

39

40 **Conclusions:** Age-specific incidence forecasts coupled with demographic forecasts can  
41 inform the impact of population ageing on TB epidemics. The TB control programme in  
42 Taiwan should develop plans specific to older age groups and their care needs.

43

44 Keywords:

45 infectious disease epidemiology; statistical modelling; time-series analysis; demographic  
46 transition; disease burden  
47

## 48 Introduction

49 In 2018, tuberculosis (TB) was still the top infectious killer in the world [1]. The End TB  
50 strategy aims at a 90% reduction in TB incidence rate by 2035 compared with 2015, but the  
51 current global rate of decline of around 2% per year is not on track to achieve this [2]. Latent  
52 TB infection risk accumulates over lifetimes while TB transmission is ongoing. The  
53 prevalence of latent TB infection is highest in older age groups [3], who not only have had  
54 the longest exposure, but were often exposed to higher TB transmission rates in the past.  
55 ageing, with associated higher rates of progression [4], thus acts as a demographic driver  
56 towards higher per capita TB incidence [5]. In the Western Pacific region, many countries  
57 have their highest per capita TB incidence rates among older age groups [1]. Among  
58 Western Pacific region countries, China, Hong Kong (China), Japan, Korean, Singapore, and  
59 Taiwan are facing both high TB burden and population ageing[6,7].

60  
61 The age profile of future TB incidence is critical for forecasting public health needs and  
62 rational policy design [8]. First, older populations will have higher TB (and background)  
63 mortality rates [9,10], which implies added difficulty in meeting treatment success targets.  
64 Secondly, older adults have more comorbidities and more complex health care needs, which  
65 may lead to a longer care-seeking process and higher healthcare expenditure per case. For  
66 instance, patients with chronic lung diseases may have signs or symptoms overlapping with  
67 TB, making correctly diagnosing their TB slower and more costly [11]. Thirdly, the proportion  
68 of TB cases in older age groups should inform policy making, for example suggesting  
69 integrating TB care entry points into long-term care programmes, or through clinician training

70 highlighting older people as a TB risk group with their own diagnostic and management  
71 challenges [11].  
72  
73 Quantitatively forecasting the TB incidence age profile needs combined models forecasting  
74 demographic change and statistical forecasts of age-specific TB incidence. However, a time  
75 series analysis producing age-specific forecasts of the TB incidence has not been published  
76 to our knowledge. Use of autoregressive integrated moving average models, often including  
77 the seasonality of TB incidence is more common [12], and comoving time series analysis  
78 has been applied [13] without age-specific information. Age-specific TB incidence modelling,  
79 including the use of age-period-cohort models, has been undertaken but without producing  
80 epidemic forecasts (e.g. Iqbal et al. [14] and Wu et al. [15]). Mechanistic mathematical  
81 modelling, with age structure, also has the potential to generate forecasts [5,16–18].  
82 However, age-specific forecasting and the impact of demographic change have yet to be  
83 analyzed.  
84  
85 In many settings, the demographic transition and population ageing are outpacing declines  
86 in TB incidence, so methods to understand and forecast the impact of changing demography  
87 on TB epidemics are needed. We, therefore, developed a statistical method capturing age-  
88 specific incidence trends and forecasting future epidemics while accounting for demographic  
89 change.

90

## 91 **Materials and Methods**

### 92 **Setting and data sources**

93 TB incidence in Taiwan has steadily declined from 64 confirmed TB cases per 100,000 in  
94 2007 to 41 per 100,000 in 2017. Since 2005, the proportion of TB cases in Taiwan over 65

95 years of age has been over 50% and increasing. Between 2007 and 2017, the average age  
96 in Taiwan increased from 36 to 40, and the proportions of adults above 65 rose from 10% to  
97 14% [7].

98

99 Notification data of culture-confirmed TB cases, excluding foreigners, were obtained from the  
100 Taiwan Center for Disease Control surveillance system. Counts were reported by age group,  
101 sex, month, and county. Ages were reported as (0-4, 5-9, ..., 65-69, 70+) years. The  
102 demographic data were obtained from the Department of Statistics, the Ministry of the  
103 Interior, Taiwan. These data included the mid-year population estimators, deaths, migration  
104 in single-year ages, and fertility in five-year age groups (15-19, ..., 45-49). We used data in  
105 2005-2018 as a training set. The demographic data from 2005 to 2017 were collected for the  
106 population demographic modelling (a shorter period because of the release schedule). All  
107 the training data in this article were published by the Taiwan officials and free access on the  
108 internet; the usage is licensed by the Open Government Data License:  
109 [<https://data.gov.tw/license>].

110

111 Importantly, we assumed no case detection gaps existed during the time frame covered by  
112 this article. We, therefore, regard “TB notification” and “TB incidence” as synonymous with  
113 the number culture-confirmed tuberculosis cases notified during a specific period.

114

## 115 Age-specific incidence modelling and forecasting

116 We considered annual incidence rates by age and sex. The incidence rates by age groups  
117 and sex were calculated as the yearly notification counts divided by corresponding mid-year  
118 population estimates. Females and males were analysed separately with the same  
119 parameterisation. We modelled the incidence rates using Lee-Carter Models (LCMs) [19]  
120 formulated with age and time-varying terms. The LCMs were initially designed for mortality

121 rate modelling, where they now predominate. Estimation, forecasting, bootstrapping  
122 methods for LCMs are well-developed.

123

124 We performed a likelihood-based LCM estimation, and also the comparable Poisson  
125 regression [20]:

$$126 \quad \log \left( E(\textit{incident cases}_{age,year}) \right) = \alpha_{age} + \beta_{age} \kappa_{year} + \log(\textit{population}_{age,year})$$

127 , where  $E(\cdot)$  is expectation function,  $year \in \{2005, \dots, 2018\}$  is the calendar year,

128  $\alpha_{age}$  is age effect term,  $\kappa_{year}$  is period effect term, and  $\beta_{age}$  is coefficients adjusting

129 period effects for different age groups, and  $age \in \{0 - 4, 5 - 9, \dots, 70+\}$  represents

130 the age categories. To maintain identifiability, we imposed the constraints

131  $\sum_{year} \kappa_{year} = 0$  and  $\sum_{age} \beta_{age} = 1$ . Two nested Poisson models, one using an age-

132 profile and a discrete period effect, i.e.  $\alpha_{age} + \kappa_{year}$ , and another using an age-profile

133 and a linear effect, i.e.  $\alpha_{age} + year \times \kappa$ , were used as comparators. Akaike

134 information criterion (AIC), Bayesian information criterion (BIC), and log-likelihood

135 were considered as goodness of fit metrics.

136

137 For forecasting, inspired by the Lee-Carter demographic forecasting, we used

138 Autoregressive Integrated Moving Average models with drift [21], constructed from the LCM

139 period effects. In forecasting, the death and birth processes applied semiparametric

140 bootstrap sampling [22].

141

## 142 Population modelling and forecasting

143 We constructed a synthetic population with birth, death and migration processes. The

144 demographic methods adapted from those used in the Taiwan National Development

145 Council's population projection report [7]. The demography was modelled by single age (0-

146 100 years old) and sex. Mortality forecasting used the Lee-Carter model [19] below 84 years  
147 of age and the Coale-Kisker method [23] for above 85. The birth forecasting used the fertility  
148 rates of women in childbearing ages, from 15 to 49, with a modified LCM [24]. For  
149 consistency with incidence forecasting, semiparametric bootstrap sampling was used for  
150 deaths and births [22]. The Migration process was modelled by linear regression with age  
151 effects and a linear trend; the forecasting applied residual bootstrap sampling with the age-  
152 specific parameters seen in 2017. The forecasts were used for the next step by aggregating  
153 to the age groups as that of the incidence data.

154

## 155 Forecasting overall TB incidence

156 The TB incidence model and the demographic model were built independently. Forecasts of  
157 age-specific TB incidence were weighted by forecasted population demography to obtain  
158 forecasts of per capita TB incidence for the whole population. TB incidence was calculated  
159 as per 100,000 rates by given strata. TB incidence rate reductions were calculated with  
160 respect to the incidence in 2015 and presented as percentages. For simplicity, some results  
161 were presented with age groups of 0-14, 15-34, 35-64, and above 65. In forecasting, the  
162 95% prediction intervals and mean values were computed from 10,000 bootstrap samples.  
163 Uncertainty was propagated from every submodel. To compare with the global reduction  
164 target of the End TB strategy [2], we forecasted the incidence until 2035. The milestones of  
165 2020, 2030 and 2035 of the End TB strategy of percentage reductions in per capita TB  
166 incidence from 2015 were used as intermediate outcomes.

167

## 168 Incidence attributable to demographic change

169 We performed a scenario analysis to clarify the potential impact of demographic change.  
170 While forecasting the age-specific TB incidence to 2035, we kept the population size and

171 age structure fixed as it was in 2018. This TB incidence was compared against values  
172 including projected changes in population structure by computing the fraction of total TB  
173 incidence attributable to demographic change in each year as  $(I_{1,year} - I_{0,year})/I_{1,year}$ ,  
174 where  $I_{1,year}$  and  $I_{0,year}$  are the incident cases with and without demographic change  
175 respectively and is the calendar year. This corresponds to the definition of population  
176 attributable fraction [25].

177

178 All the analyzes were performed using R 3.5 [26] and analyzed/visualized by R package  
179 StMoMo, TSA, ggplot2 [27–29]. All analysis code is available at  
180 [<https://github.com/TimeWz667/AgeingTB>].

181

## 182 Results

### 183 Incidence modelling

184 Fig 1 shows the estimators of the Lee-Carter models of the incidence data. The age effect  
185 estimators ( $\alpha_{age}$ ) suggested the baseline incidence rates increase with age. In both  
186 sexes, the higher levels in age groups older than fifteen years correspond to higher  
187 TB incidence rates. The point estimators of age-period adjustments ( $\beta_{age}$ ) showed  
188 no specific trend. However, there are large uncertainties for all estimates pertaining  
189 to under 15-year age groups, excepting the reference group aged 0-4. The period  
190 effect estimators ( $\kappa_{year}$ ) had nearly constant trends with calendar years. Fig 1 also  
191 demonstrates the forecasting of period effects with 95% prediction intervals: prediction  
192 intervals of both sexes grew at a constant rate with calendar time. Table 1 shows the  
193 goodness of fit of the LCMs, the nested age-period Poisson models, and age-trend Poisson



194 models. In AIC, BIC and log-likelihood on the training data, the LCM result is preferred over  
195 the other two although it cost a higher degree of freedom. See S1 Appendix for the details of  
196 the goodness of fit, and residuals plots.

197

198

199 **Table 1. Summary of model comparison**

|                  | Age-Trend          | Age-Period | Lee-Carter Model |
|------------------|--------------------|------------|------------------|
| Model family     | Poisson Regression |            |                  |
| Period effect    | Linear             | Discrete   |                  |
| No. observations | 420                |            |                  |
| No. parameters   | 32                 | 56         | 84               |
| Log(Likelihood)  | -1855              | -1819      | -1682            |
| AIC              | 3773               | 3751       | 3531             |
| BIC              | 3902               | 3977       | 3871             |

200 AIC: Akaike information criterion, BIC: Bayesian information criterion

201

## 202 Population forecasting

203 Fig 2 shows the demographic change from 2005 to 2035. In Fig 2A, the population will reach  
204 a maximum of 23.6 million in 2023, and will start shrinking to 23.2 million in 2035. The  
205 proportion of the population aged over 65 is increasing across the period and will reach 27%  
206 in 2035. The proportion of the population aged under 15 is declining to around 11%. Fig 2B  
207 compares the age structure of the Taiwanese population in 2018 and 2035, highlighting the  
208 population ageing.

209

## 210 Incidence forecasting and age structure

211 Fig 3 demonstrates the trends of the population TB incidence rate and TB incidence rates by  
212 age-group (<15, 15-34, 35-64, >65). The forecast in Fig 3A suggests that the TB incidence in  
213 2035 will be 22 (95% Prediction Interval (PI): 19-25) per 100 000. The overall incidence  
214 reduction will reach 54% (95% PI: 45%-59%) in 2035, which is 37% short of the 90%  
215 reduction in the End TB Strategy. Fig 3B shows the age-specific incidence rates will have  
216 60% to 80% reductions from 2015 to 2035 apart from the 5-9 group. The rate reductions in  
217 most age groups will be higher than the forecast reduction of 44% in the whole population.  
218 Fig 3C decomposes the overall incidence rates by age groups. The TB incidence rates from  
219 age groups below 65 will be gradually decreasing whereas the above 65 will nearly stay  
220 constant from 2018 to 2035. Fig 3D shows the proportion of TB incidence in each age group.  
221 The proportion among adults aged over 65 years will reach 68% (95% PI: 67%-69%) and  
222 79% (95% PI: 78%-81%) in 2025 and 2035, respectively. In 2035, more than 97% of incident  
223 cases will occur among those aged 35 years or older.

224

## 225 Impact of demography on TB incidence

226 Fig 4 shows the forecast incidence rates with and without demographic change. In the  
227 scenario without demographic change, the forecast suggests that the incidence in 2035 will  
228 be around 13 per 100,000 compared to 23 with demographic change and the 90% reduction  
229 target of 4.5 per 100,000. The 95% prediction intervals for forecasts with demographic  
230 change continuously expand year by year, whereas without demographic change they  
231 converge to a constant width within five years. Table 2 shows the impact of demographic  
232 change. Up to 2020, TB incidence rates will have 23% and 27% reductions with and without  
233 demographic change respectively. Considering demographic change, the incidence rates  
234 are projected to reduce by 54% (95% PI: 45%-59%) from 2015 to 2035; without

235 demographic change, the reduction will be 72% (95% PI: 67%-76%). In both scenarios, the  
 236 trends of incidence rates showed diminishing reductions to the time scale. In 2035, the  
 237 forecasts suggested that 39% (95% PI: 36%-42%) of incident TB cases can be attributed to  
 238 demographic change.

239

240 **Table 2. Summary of reductions in TB incidence reductions with and without**  
 241 **demographic change**

| Year | Percentage reduction in per capita TB incidence from 2015: |                                       | Percentage of total TB incidence attributable to demographic change |
|------|------------------------------------------------------------|---------------------------------------|---------------------------------------------------------------------|
|      | with demographic change                                    | without demographic change after 2018 |                                                                     |
| 2020 | 23.1% (18.2%, 27.2%)                                       | 26.6% (22.2%, 30.8%)                  | 4.6% (1.6%, 7.5%)                                                   |
| 2025 | 35.2% (27.2%, 40.7%)                                       | 47.0% (41.0%, 52.2%)                  | 18.3% (15.5%, 21.2%)                                                |
| 2030 | 45.0% (35.9%, 50.5%)                                       | 61.6% (56.0%, 66.4%)                  | 30.0% (27.3%, 33.0%)                                                |
| 2035 | 53.7% (44.5%, 58.9%)                                       | 72.1% (67.1%, 76.1%)                  | 38.8% (36.1%, 41.7%)                                                |

242

## 243 Discussion

244

245 A substantial proportion of tuberculosis (TB) incidence in Taiwan is among people aged over  
 246 65 years. Social and economic development typically bring reductions in TB incidence but  
 247 also reduced birth and death rates and population ageing. This study provides a novel  
 248 investigation into the potential impact on TB incidence from population ageing using  
 249 statistical modelling and forecasting. Current trends of TB incidence declines and  
 250 demographic change suggest TB incidence rates in Taiwan will decrease to 25 per 100,000  
 251 by 2035. This represents a 45% reduction since 2015, missing the End TB goal of 90%  
 252 reductions in TB incidence rates. We have shown that higher age-specific incidence rates in

253 older age groups can mean that population ageing acts against reductions in TB rates, with  
254 TB incidence in 2035 projected to be 39% higher than without demographic change.

255

256 Previous studies have employed statistical methods either to forecast TB incidence,  
257 [12,13,30,31] or to analyze patterns by age using age-period-cohort models, [14,15] but we  
258 are the first study to statistically forecast age-specific TB incidence. Some transmission  
259 modelling studies [16,18] have explored issues related to age-structure, but without  
260 forecasts or formal assessment of fit. We made novel use of Lee-Carter models (LCMs),  
261 [19,21] which employ an elegant low-dimensional decomposition of age-specific rates to  
262 model trends and overall shape. LCMs were originally introduced for mortality rate modelling  
263 and are now the dominant approach, but have been applied elsewhere. Within demography,  
264 Hyndman [24] and Rueda-Sabater and Alvarez-Esteban [32] used LCMs to forecast the  
265 fertility rates, and Cowen [33] fitted LCMs to abortion rates. Kainz et al. [34] modelled  
266 chronic kidney disease prevalence as rate data, and Yue et al. [35] modelled cancer  
267 incidence and mortality. However, we are the first to apply LCMs to TB, finding they fitted  
268 better than Poisson Age-Period models. Our approach offers a generalizable and easily-  
269 implemented method for forecasting age-specific TB incidence and the impact of  
270 demographic change on total TB incidence.

271

272 For Taiwan and many other high-income settings, TB notifications are thought to parallel TB  
273 incidence with only a small gap. In settings where this gap is larger and changing over time,  
274 interpretation of TB notification data is more problematic and notifications may not be a good  
275 proxy for incidence. Taiwan does not have United Nations Population Division demographic  
276 forecasts, hence our bespoke demographic modelling. For most nations, these forecasts  
277 could be used 'off the shelf'. We have presented results on percentage reductions in both  
278 per capita TB incidence rates and in total TB incidence (e.g. Table 2), which are similar  
279 because of Taiwan's small projected population change over the period considered; this may  
280 not be true in all settings.

281

282 The decline in TB incidence in Taiwan probably has multiple contributory causes, including  
283 improvements in TB control, socio-economic development, and the reductions in the  
284 prevalence of latent TB as a result of declining transmission. For an infectious disease like  
285 TB, reduced transmission can amplify and sustain over time changes in underlying causative  
286 factors, complicating their analysis. The low TB rates in children aged under fifteen may  
287 reflect low exposure to TB in this group or potentially lower rates of case detection. Our  
288 assessment of the impact of population ageing on TB incidence and case-mix has particular  
289 current relevance to many WHO Western Pacific region countries [1] and will be relevant to  
290 many more countries and regions in the future. Our analysis could provide a template for  
291 analysts who wish to explore issues related to future TB incidence and demography where  
292 age-specific data are available.

293

294 Our analysis accounted for cohort propagation of latent tuberculosis infection (LTBI) in a  
295 phenomenological way. LTBI represents accumulated lifetime risk of infection by exposure to  
296 active tuberculosis disease. Older individuals in most settings have higher LTBI prevalence  
297 due both to longer cumulative exposure and (in declining epidemics) exposure to a higher  
298 mean infection rate over their lifetime. The ageing through of these LTBI positive cohorts  
299 thus generates a secular time trend in reactivation disease rates at a particular age. Our  
300 approach does not explicitly model LTBI prevalence, because this would introduce additional  
301 parameters and, without LTBI data, identifiability issues. However, LTBI cohort effects are  
302 accounted for in our current approach indirectly by modelling the secular trends in age-  
303 specific incidence rates.

304

305 Extending the model by adding exogenous variables is possible. Our analysis did not  
306 address the impact of other variables for simplicity and clarity. Important predictors could  
307 include socioeconomic status and comorbidities such as diabetes mellitus. [36] However,

308 projections would require additional time-series analysis to forecast these explanatory  
309 variables.

310

311 Older age as a risk factor for TB disease has perhaps been under-explored since age is not  
312 a modifiable risk factor, and since in most current high-burden settings populations and the  
313 typical age of TB cases are fairly young. Our result that population ageing will act to slow  
314 declines in TB incidence does not seem to have been previously noted. However, the  
315 importance of older age groups to TB control is already evident in many Asian populations,  
316 [16] and this will be an increasingly widespread facet of global TB control if reductions in  
317 incidence continue and accelerate in the future. Older populations will also have their own  
318 particular challenges in terms of access, diagnosis and comorbidities complicating their care.  
319 Public health planning to develop adapted strategies for care and control to meet these  
320 changing population needs is essential.

321

322 In summary, the Lee-Carter model provides a tool to project age-specific tuberculosis  
323 incidence and hence forecast overall TB incidence while accounting for demographic  
324 change. In Taiwan, population ageing may slow the decline of TB incidence by 39% over the  
325 period 2015 - 2035. TB care and control programmes will increasingly need to address the  
326 needs of older adults, who will comprise a growing majority of the TB epidemic.

## 327 References

328

329 1. World Health Organization. Global tuberculosis report 2018. World Health Organization;  
330 2018;

331 2. World Health Organization. Global strategy and targets for tuberculosis prevention, care  
332 and control after 2015. Geneva: World Health Organization. 2014;

333 3. Houben RMGJ, Dodd PJ. The Global Burden of Latent Tuberculosis Infection: A Re-  
334 estimation Using Mathematical Modelling. PLoS Med. 2016;13: e1002152.

335 4. Schaaf HS, Collins A, Bekker A, Davies PDO. Tuberculosis at extremes of age.  
336 Respirology. 2010;15: 747–763.

337 5. Vynnycky E, Borgdorff MW, Leung CC, Tam CM, Fine PEM. Limited impact of  
338 tuberculosis control in Hong Kong: attributable to high risks of reactivation disease.  
339 Epidemiol Infect. 2008;136: 943–952.

340 6. United Nations Publications. World Population Ageing, 2015. UN; 2017.

341 7. National Development Council, Taiwan. Population Projections for the R.O.C. (Taiwan):  
342 2018-2065. National Development Council, Taiwan; 2018.

343 8. Dye C, Williams BG. The population dynamics and control of tuberculosis. Science.  
344 2010;328: 856–861.

345 9. Pratt RH, Winston CA, Steve Kammerer J, Armstrong LR. Tuberculosis in Older Adults  
346 in the United States, 1993-2008 [Internet]. Journal of the American Geriatrics Society.  
347 2011. pp. 851–857. doi:10.1111/j.1532-5415.2011.03369.x

348 10. Hagiya H, Koyama T, Zamami Y, Minato Y, Tatebe Y, Mikami N, et al. Trends in

- 349 incidence and mortality of tuberculosis in Japan: a population-based study, 1997-2016.  
350 *Epidemiol Infect.* 2018; 1–10.
- 351 11. Negin J, Abimbola S, Marais BJ. Tuberculosis among older adults – time to take notice  
352 [Internet]. *International Journal of Infectious Diseases.* 2015. pp. 135–137.  
353 doi:10.1016/j.ijid.2014.11.018
- 354 12. Bras AL, Gomes D, Filipe PA, de Sousa B, Nunes C. Trends, seasonality and forecasts  
355 of pulmonary tuberculosis in Portugal. *Int J Tuberc Lung Dis.* 2014;18: 1202–1210.
- 356 13. van Aart C, Boshuizen H, Dekkers A, Altes HK. Time Lag Between Immigration and  
357 Tuberculosis Rates in Immigrants in the Netherlands: A Time-Series Analysis.  
358 *International Journal of Tuberculosis and Lung Disease.* 2017;21: 486–492.
- 359 14. Iqbal SA, Winston CA, Bardenheier BH, Armstrong LR, Navin TR. Age-Period-Cohort  
360 Analyses of Tuberculosis Incidence Rates by Nativity, United States, 1996-2016. *Am J*  
361 *Public Health.* 2018;108: S315–S320.
- 362 15. Wu P, Cowling BJ, Schooling CM, Wong IOL, Johnston JM, Leung C-C, et al. Age-  
363 period-cohort analysis of tuberculosis notifications in Hong Kong from 1961 to 2005.  
364 *Thorax.* 2008;63: 312–316.
- 365 16. Harris RC, Sumner T, Knight GM, Evans T, Cardenas V, Chen C, et al. Age-targeted  
366 tuberculosis vaccination in China and implications for vaccine development: a modelling  
367 study. *Lancet Glob Health.* Elsevier; 2019;7: e209–e218.
- 368 17. Brooks-Pollock E, Cohen T, Murray M. The impact of realistic age structure in simple  
369 models of tuberculosis transmission. *PLoS One.* 2010;5: e8479.
- 370 18. Arregui S, Iglesias MJ, Samper S, Marinova D, Martin C, Sanz J, et al. Data-driven  
371 model for the assessment of *Mycobacterium tuberculosis* transmission in evolving  
372 demographic structures. *Proc Natl Acad Sci U S A.* 2018;115: E3238–E3245.



- 373 19. Lee RD, Carter LR. Modeling and Forecasting U. S. Mortality. J Am Stat Assoc.  
374 [American Statistical Association, Taylor & Francis, Ltd.]; 1992;87: 659–671.
- 375 20. Brouhns N, Denuit M, Vermunt JK. A Poisson log-bilinear regression approach to the  
376 construction of projected lifetables [Internet]. Insurance: Mathematics and Economics.  
377 2002. pp. 373–393. doi:10.1016/s0167-6687(02)00185-3
- 378 21. Lee R. The Lee-Carter Method for Forecasting Mortality, with Various Extensions and  
379 Applications. N Am Actuar J. Routledge; 2000;4: 80–91.
- 380 22. Renshaw AE, Haberman S. On simulation-based approaches to risk measurement in  
381 mortality with specific reference to Poisson Lee–Carter modelling [Internet]. Insurance:  
382 Mathematics and Economics. 2008. pp. 797–816.  
383 doi:10.1016/j.insmatheco.2007.08.009
- 384 23. Coale AJ, Kisker EE. Defects in data on old-age mortality in the United States: new  
385 procedures for calculating mortality schedules and life tables at the highest ages. Coale  
386 Kisker 1990 Asian and Pacific Population Forum. Honolulu Hawaii Coale Ansley J. 1990  
387 Spring.; 1990;
- 388 24. Hyndman RJ, Booth H. Stochastic population forecasts using functional data models for  
389 mortality, fertility and migration. Int J Forecast. 2008;24: 323–342.
- 390 25. Steenland K, Armstrong B. An overview of methods for calculating the burden of  
391 disease due to specific risk factors. Epidemiology. JSTOR; 2006;17: 512–519.
- 392 26. R Core Team. R: A Language and Environment for Statistical Computing [Internet].  
393 Vienna, Austria: R Foundation for Statistical Computing; 2018. Available: [https://www.R-](https://www.R-project.org/)  
394 [project.org/](https://www.R-project.org/)
- 395 27. Wickham H. ggplot2: Elegant Graphics for Data Analysis [Internet]. Springer-Verlag  
396 New York; 2016. Available: <http://ggplot2.org>

- 397 28. Andres V, Millossovich P, Vladimir K. StMoMo: Stochastic Mortality Modeling in R. J  
398 Stat Softw. arts.units.it; 2018;84: 1–38.
- 399 29. Chan K-S, Ripley B. TSA: Time Series Analysis [Internet]. 2018. Available:  
400 <https://CRAN.R-project.org/package=TSA>
- 401 30. Onozaki I, Law I, Sismanidis C, Zignol M, Glaziou P, Floyd K. National tuberculosis  
402 prevalence surveys in Asia, 1990-2012: an overview of results and lessons learned.  
403 Trop Med Int Health. 2015;20: 1128–1145.
- 404 31. Suarez PG, Watt CJ, Alarcon E, Portocarrero J, Zavala D, Canales R, et al. The  
405 Dynamics of Tuberculosis in Response to 10 Years of Intensive Control Effort in Peru. J  
406 Infect Dis. 2001;184: 473–478.
- 407 32. Rueda-Sabater C, Alvarez-Esteban PC. The analysis of age-specific fertility patterns via  
408 logistic models. J Appl Stat. Taylor & Francis; 2008;35: 1053–1070.
- 409 33. Cowan SK. Cohort Abortion Measures for the United States. Popul Dev Rev. 2013;39:  
410 289–307.
- 411 34. Kainz A, Hronsky M, Stel VS, Jager KJ, Geroldinger A, Dunkler D, et al. Prediction of  
412 prevalence of chronic kidney disease in diabetic patients in countries of the European  
413 Union up to 2025. Nephrol Dial Transplant. 2015;30 Suppl 4: iv113–8.
- 414 35. Yue JC, Wang H-C, Leong Y-Y, Su W-P. Using Taiwan National Health Insurance  
415 Database to model cancer incidence and mortality rates. Insur Math Econ. 2018;78:  
416 316–324.
- 417 36. Marais BJ, Lönnroth K, Lawn SD, Migliori GB, Mwaba P, Glaziou P, et al. Tuberculosis  
418 comorbidity with communicable and non-communicable diseases: integrating health  
419 services and control efforts. Lancet Infect Dis. 2013;13: 436–448.

420

421 **Figures**

422 **Fig 1. Lee-Carter model fitting and forecasting of the TB incidence.** (Data: 2005-2018,  
 423 Forecasting: 2019-2035). 95% confidence intervals of estimators and prediction intervals of  
 424 forecasts were calculated through bootstrapping with 10 000 sample size.

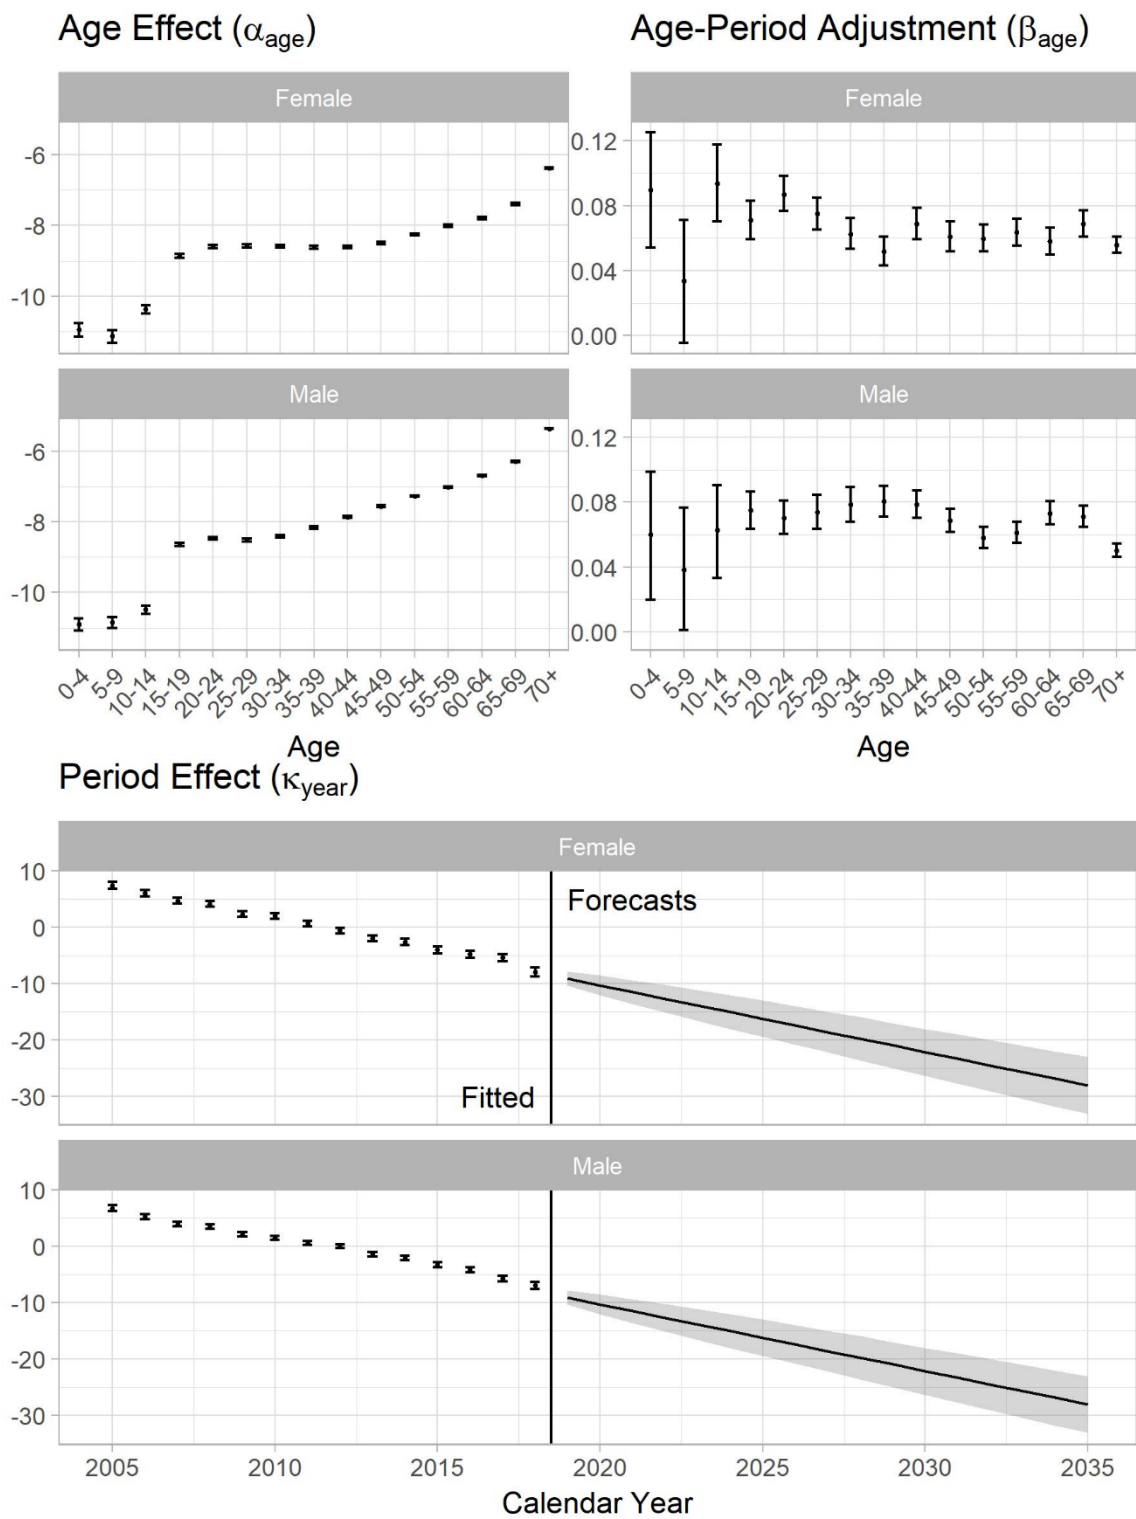

425

426 **Fig 2. Demographic change.** Data: 2005-2017, Forecasting: 2018-2035

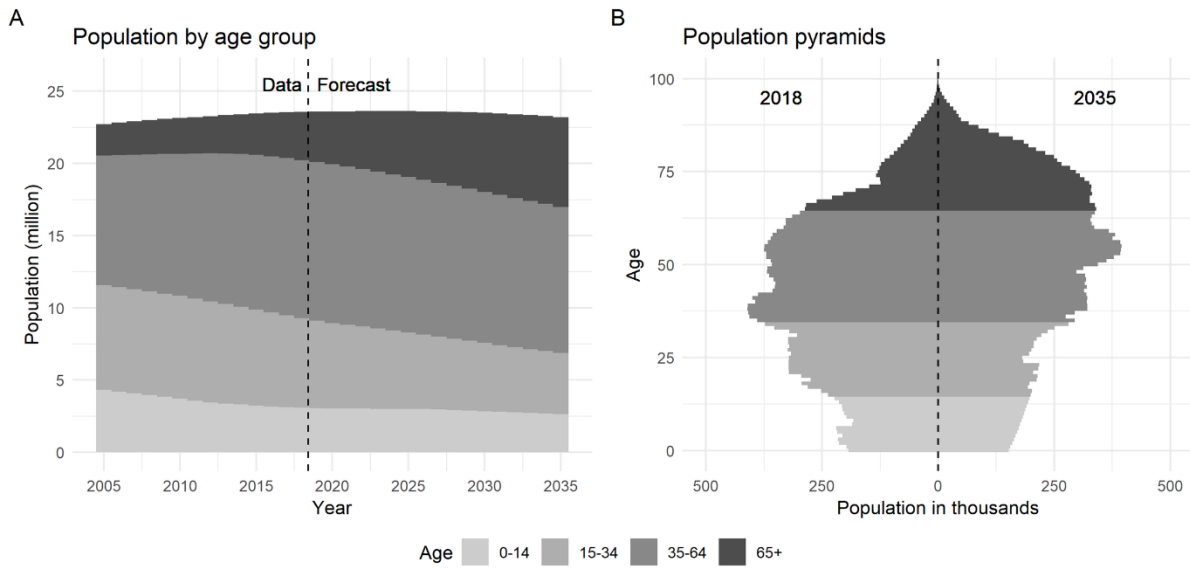

427

428 **Fig 3. TB incidence rate forecasting.** (A) Overall incidence rate per 100 000. In the  
 429 forecasting, dashed line features the mean values and the shaded area is 95% prediction  
 430 interval. (B) Incidence rate reductions by five-year age groups during 2015-2035 with 95%  
 431 prediction interval. (C) Incidence rates attributed to age groups. (D) Proportions of age  
 432 groups in Incidence cases.

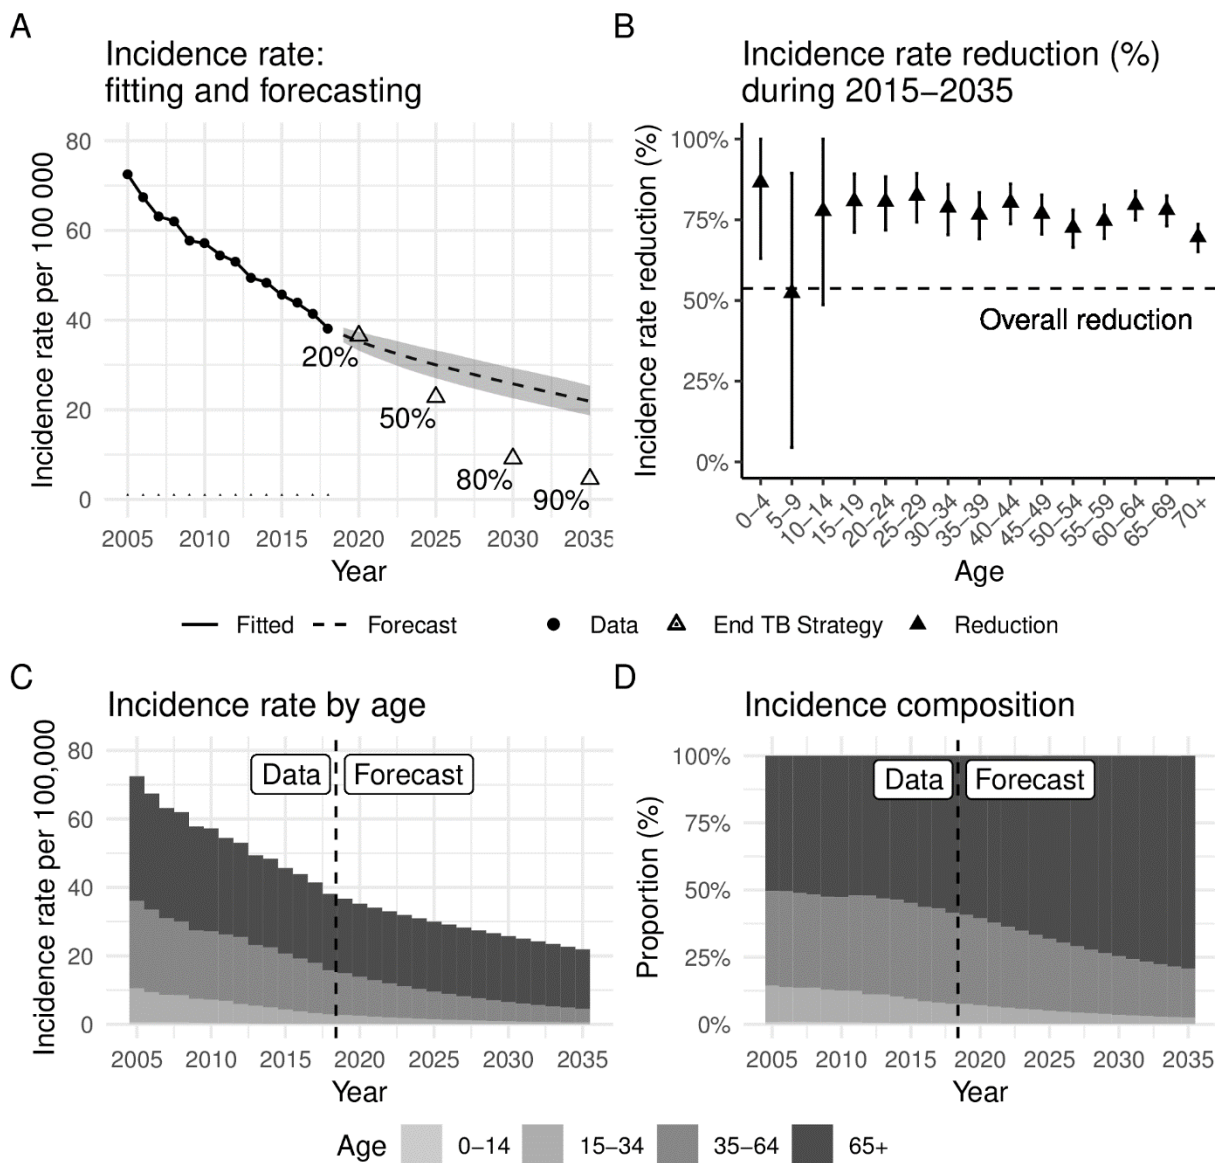

433

434

435 **Fig 4. TB incidence with and without demographic change.** ribbons show 95% prediction  
436 intervals.

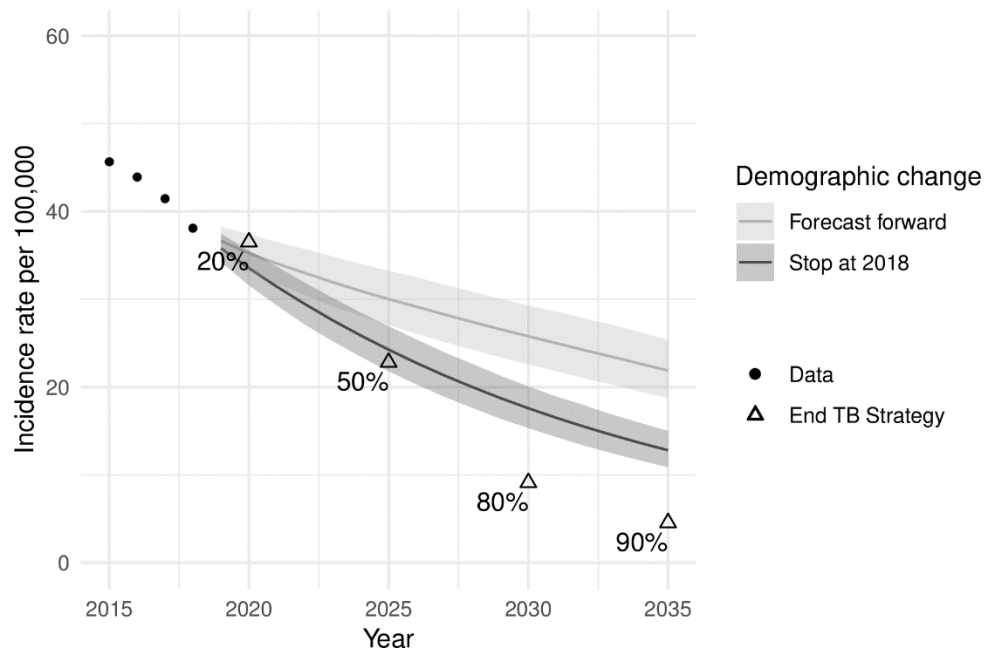

437

438

## 439 Supporting information

440 **S1 Appendix. Residual analysis and the goodness of fit.**
